# Supplementary material
Source: publisher figshare collection journal article supplement (https://frontiersin.figshare.com/ndownloader/files/15634151)
Supplement: Supplementary file [file 15634151]

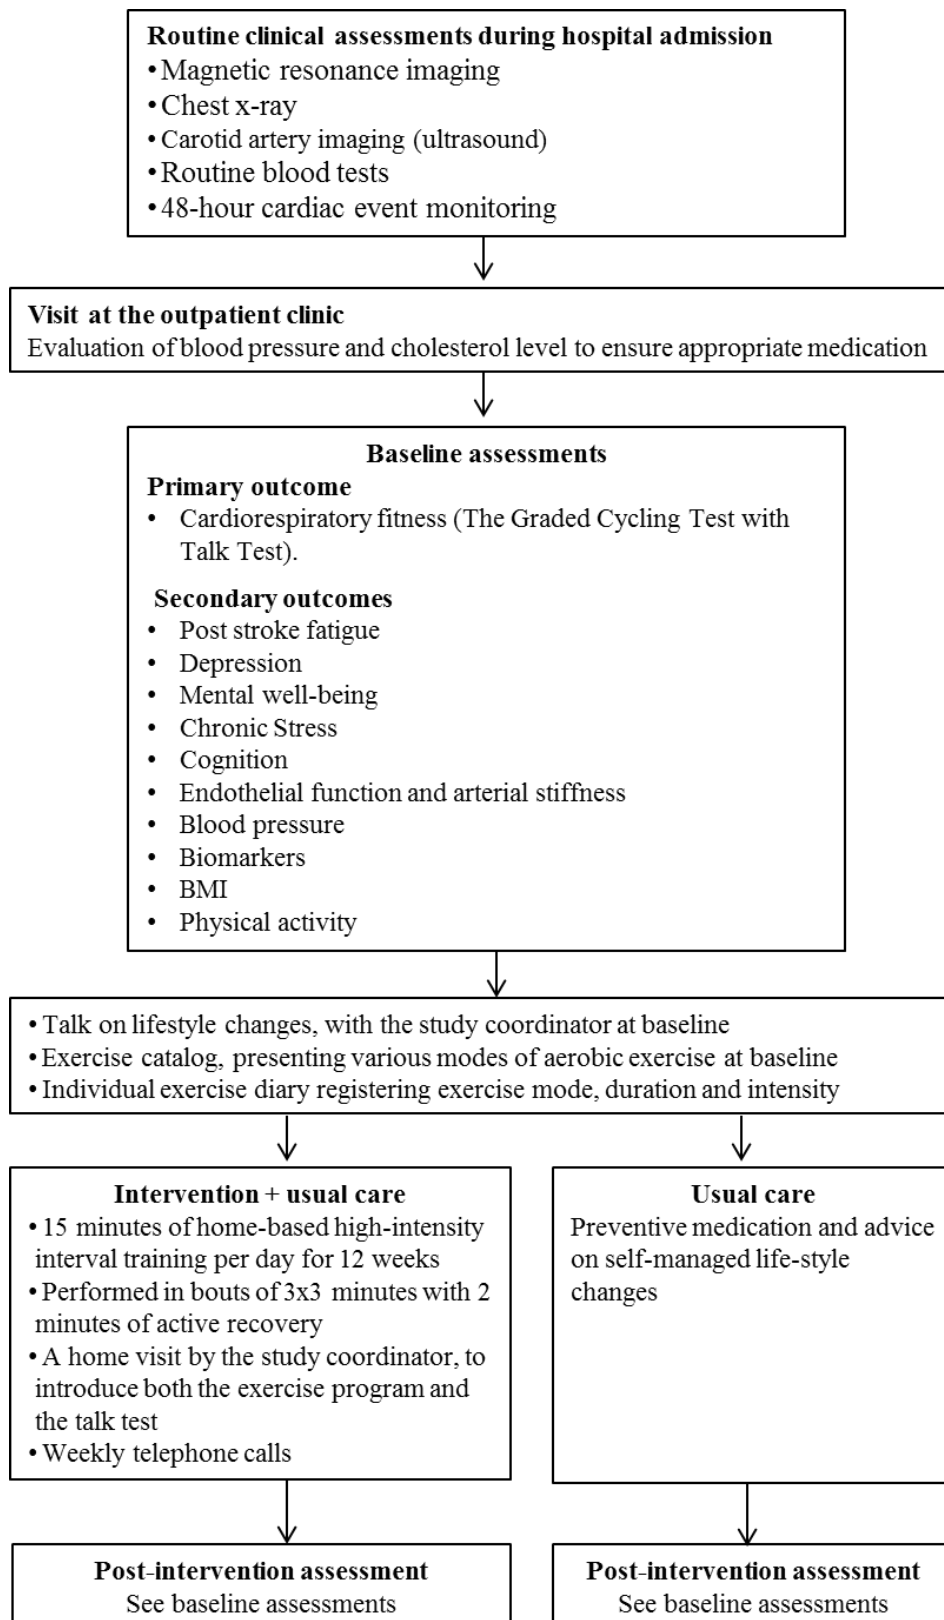

**Figure S1. Overview of study procedure**
